# Supplementary material
Source: MDPI journal article supplement (https://www.mdpi.com/2072-4292/14/19/4977)
Supplement: s1 [file s1 › remotesensing-1929579-supplementary.pdf]

## **Supplementary materials**

### **Hydrological connectivity can improve water quality and drive high variability of hydrochemistry: A study on a typical inland river in Xinjiang, China**

**Chuanxiu Liu <sup>1,2</sup>, Yaning Chen<sup>1, \*</sup>, Zhi Li <sup>1</sup>, Gonghuan Fang<sup>1</sup>, Honghua Zhou<sup>1</sup>, Wenjing Huang<sup>1,2</sup>, Yongchang Liu<sup>1,2</sup>, Xuanxuan Wang<sup>1,2</sup>**

<sup>1</sup> State Key Laboratory of Desert and Oasis Ecology, Xinjiang Institute of Ecology and Geography, Chinese Academy of Sciences, Urumqi 830011, China

<sup>2</sup> College of Resources and Environment, University of China Academy of Sciences, Beijing 100049, China

\* Corresponding author: Yaning Chen (chenyn@ms.xjb.ac.cn)

### **Text S1. Selection of hydrological connectivity thresholds**

Using the Conefor plug-in (Conefor input) generated by Conefor Sensinode 2.6 in ArcGIS 10.2 software, to calculate the input files required for the hydrological connectivity index, including node files (water patches), connection files (connections between pairs of nodes described by Euclidean distances), and output the files in the form of tables. The integral index of connectivity (IIC) is calculated by Conefor Sensinode 2.6 software. The threshold distance of patch connectivity is required for the calculation. We have demonstrated that when the threshold reaches 20,000 m, most of the IIC index reach 1 and no longer change. The following distances have been tested for calculating the IIC in 1998 (dry year), 2003 (normal period), and 2010 (wet period) (Table.A2): 30m, 50m, 100m, 250m, 500m, 750m, 1000m, 1500m, 2000m, 2500m, 3000m, 4000m, 4500m, 5000m, 6000m, 7000m, and 8000m. The results showed that the IIC in BLB showed a consistent trend in different periods, which all increased with the increase of distance threshold (Figure.A5); when the distance threshold is between 30m and 2000 m, the IIC grows rapidly, and the connectivity of the patches in this interval is unstable and easily affected by the threshold; when the distance threshold is between 2000 m and 8000 m, the IIC grows but tends to be stable, and the connectivity of the patches is more stable and less affected by the change of threshold. At a distance threshold above 20000 m, the IIC remains stable and the patches within the whole habitat are connected. In summary, the distance threshold for calculating hydrological connectivity has been set at 2000 m.

## **Text S2. Characteristics of water body changes in the BLB**

The average annual total water body area (TWA) in the BLB from 1990 to 2019 was 1415.34 km<sup>2</sup> (Fig.A6a), accounting for 1.56% of the total basin area. The permanent water area (PWA) and seasonal water area (SWA) were 1100.39 km<sup>2</sup> and 314.95 km<sup>2</sup>, respectively, accounting for 77.75% and 22.25% of the TWA, respectively (Fig. A6b). In 2019, there was a 509.94 km<sup>2</sup> fluctuating increasing trend in TWA compared to 1990 (Fig. A6a). The increase (about 610.67 km<sup>2</sup>) was mainly concentrated in 1990-2000, and the decreasing occurring in 2000-2007. Noteworthy is that SWA increased at an average rate of 9.41 km<sup>2</sup> per year, with a total increase of 275.39 km<sup>2</sup> during the study period, whereas PWA increased only one-third the rate of SWA, with an average increase of 3.36 km<sup>2</sup> per year. By 2019, PWA had increased only 24.44% compared to 1990.

In general, PWA and SWA showed increases like TWA. These were mainly concentrated in 1990-2000 and rose 252.881 km<sup>2</sup> and 357.78 km<sup>2</sup>, respectively. PWA continued to increase at a rate of 2.89 km<sup>2</sup>/yr in 2000-2019, while SWA decreased at a rate of 1.70 km<sup>2</sup>/yr. Figure 3c shows that the area of land-to-water conversion over the past 30 years was 1599.7 km<sup>2</sup>. The largest conversion was to SWA (around 1199.47 km<sup>2</sup>), while the area converted from SWA to land was also relatively large (about 871.80 km<sup>2</sup>). The conversion of PWA to land was mainly concentrated in 2000-2005, with the conversion amount topping 124.47 km<sup>2</sup>. The rest of the time period saw land converted to PWA.

Spatially, the distribution of water bodies in the BLB is diverse. The water bodies

were mainly spread across higher altitudes in the KDH and the oasis area in the KKH, while there were very few water bodies distributed in KQH, especially in the lower reaches of the Konqi River. As shown in Figs. A7a and b, the increase in water body area mainly occurred around Bosten Lake and in the main stream of the Kaidu River (Figs. A7c-h). The water body area around Bosten Lake showed varying degrees of increasing changes during most of the study period, except for 2000-2005. Specifically, the water body area around Bosten Lake increased around 455.30 km<sup>2</sup> from 1990 to 2000, which represents 74.56% of the change in this period and 89.29% of the total change in TWA, respectively. The reason for this phenomenon is that as the climate warms, there is an increase in ice and snow meltwater along with enhanced river runoff recharge in the KDH, which belongs to the high-altitude mountainous region. This leads to an increase in the upstream watershed area (Fan et al., 2021; Deng et al., 2015). Meanwhile, the river's middle reaches, which belong to the oasis ecosystem, are a water-consuming area with a complex river-lake-reservoir network system (Ariken et al., 2020; Li et al., 2015). Water consumption from human activities and ecological water demand dissipation decreases water resources and results in low runoff and serious desertification in the lower reaches of the Konqi River.

The largest permanent water patch in the BLB is the Bosten Lake, with an annual average area of 968.98 km<sup>2</sup>, which accounts for 87.87% of the PWA. BLA had a significant temporal variation characteristic (Fig.A1). Bosten Lake area (BLA) increased rapidly at a rate of 9.6 km<sup>2</sup>/yr from 1990 to 2000, approximately 108.64 km<sup>2</sup>. while from 2000 to 2007, BLA decreased rapidly, averaging 20 km<sup>2</sup> per year, and BLA

reached its lowest value of 899.31 km<sup>2</sup> in 2007 and then increased rapidly at a rate of 11.22 km<sup>2</sup>/yr to a maximum value of 1041.08km<sup>2</sup> (2018). The fluctuation trend of BLL was generally consistent with the BLA (Fig.A1). Specifically, Bosten Lake level (BLL) shows a characteristic of rising (1990-2002), then falling (2003-2013) and then rising (2013-2019), with a maximum value of 1048.65m in 2002 and a minimum value of 1045.12m in 2013.

The annual average concentration of TDS reached 1308.67 mg/L, which was brackish. The attainment rate of the freshwater standard was 10.52%, with its highest concentration up to 1779.13 mg/L occurring in 2013. Only in 2016 and 2019 did it reach the freshwater standard (< 1000 mg/L) (Table.A4). At the same time, however, its concentration had the fastest interannual decline rate (4.82 mg/L/y) and a high degree of variability (SD = 224) (Table.A5). Therefore, the water environment management of Bosten Lake should focus on COD, TN, and TDS pollution. Additionally, the management of agricultural activities around the lake should be strengthened and the hydrological connectivity of the surrounding canals should be increased to increase the hydrodynamics of the lake and enhance its self-purification capacity.

### **Text.S3. Water quality change characteristics from 2001-2019**

In general, DO facilitates the dissolution of various pollutants in a water body so that it can be purified more quickly (Baxa et al., 2021). The concentration of COD did not exceed the surface water category III standard from 2001 to 2019, as shown in Fig. 6a, but its concentration was in a decreasing trend. Moreover, the mean concentration of NH<sub>3</sub>-N was 0.12 mg/L, which is compliant with the standard of surface water

category III ( $\leq 1$  mg/L). The attainment rate is 100%, while its concentration shows an increasing trend with a large dispersion ( $CV = 0.56$ ) (Fig. 5d and Table.A5). This further indicates that although there is no DO or  $NH_3-N$  pollution in Bosten Lake at present, the concentration of these two substances will increase with the impact of human activities. Moreover, because the result will likely cause water pollution, preventative measures should be taken in advance.

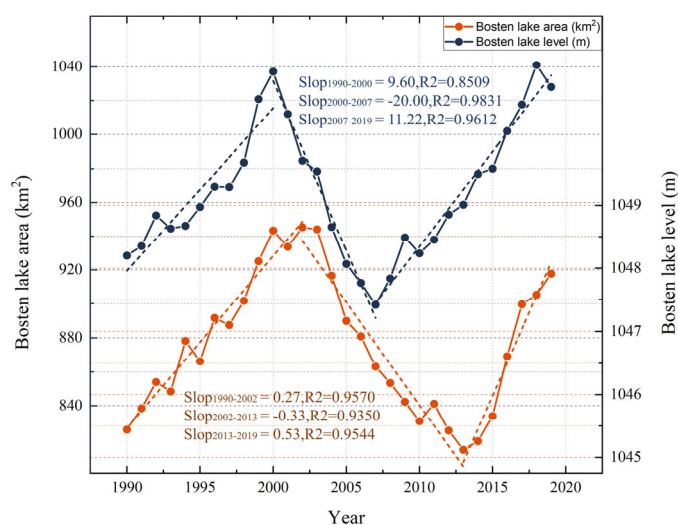

**Figure S1.** Change trend of Bosten lake water area and level change from 1990 to 2019.

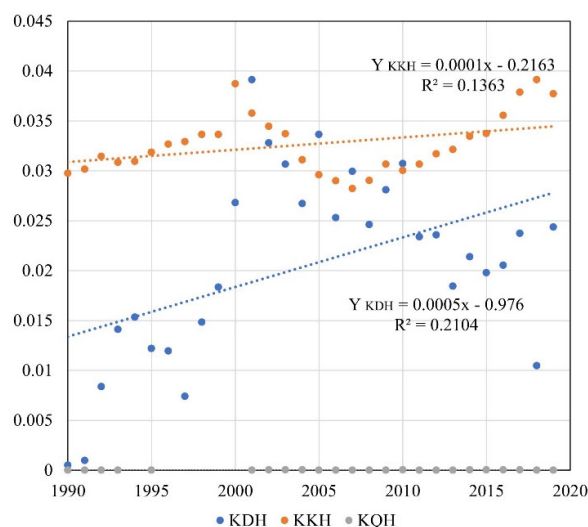

**Figure S2.** Time series and trends of yearly IIC from 1990-2019 of each sub-basin.

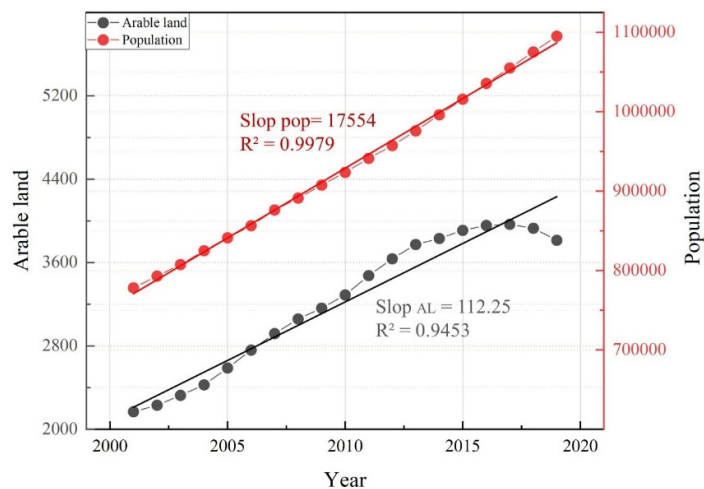

**Figure S3.** Arable land area and population change of BLB.

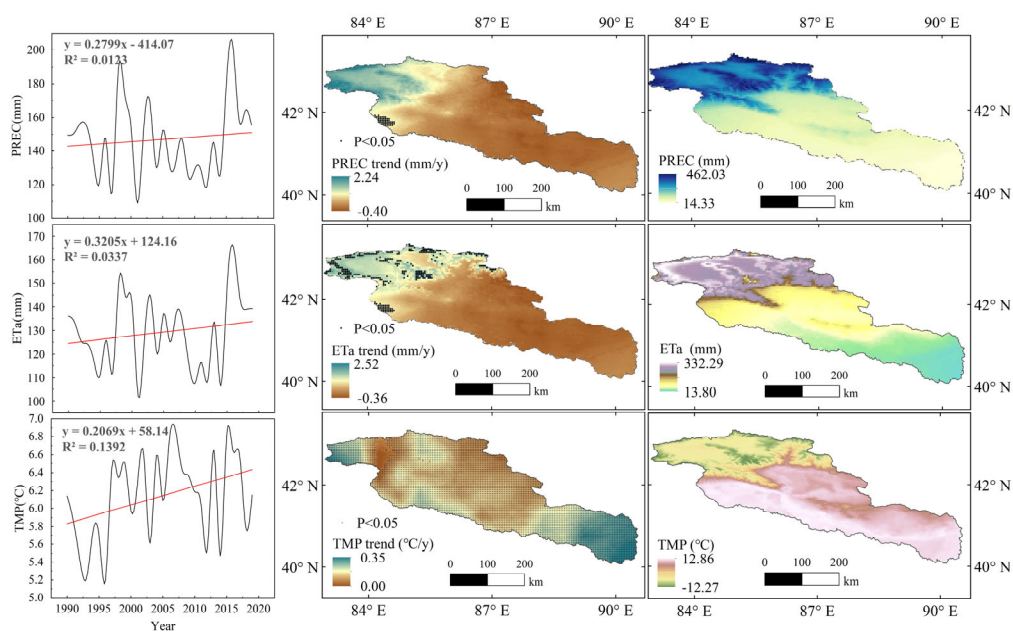

**Figure S4.** Temporal and spatial variations of PREC, ETa and TMP and their significance tests. Black dots represent passing the  $P < 0.05$  test.

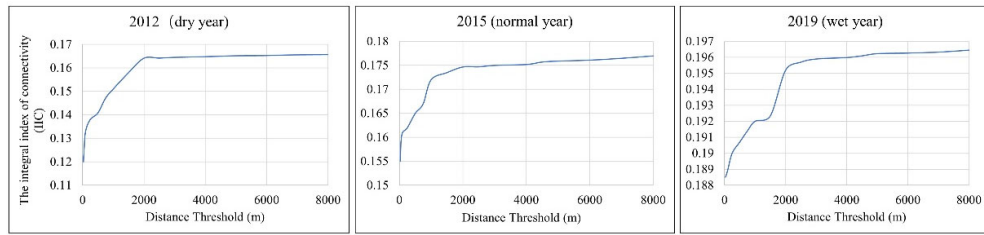

**Figure S5.** Variation of IIC at different distance thresholds

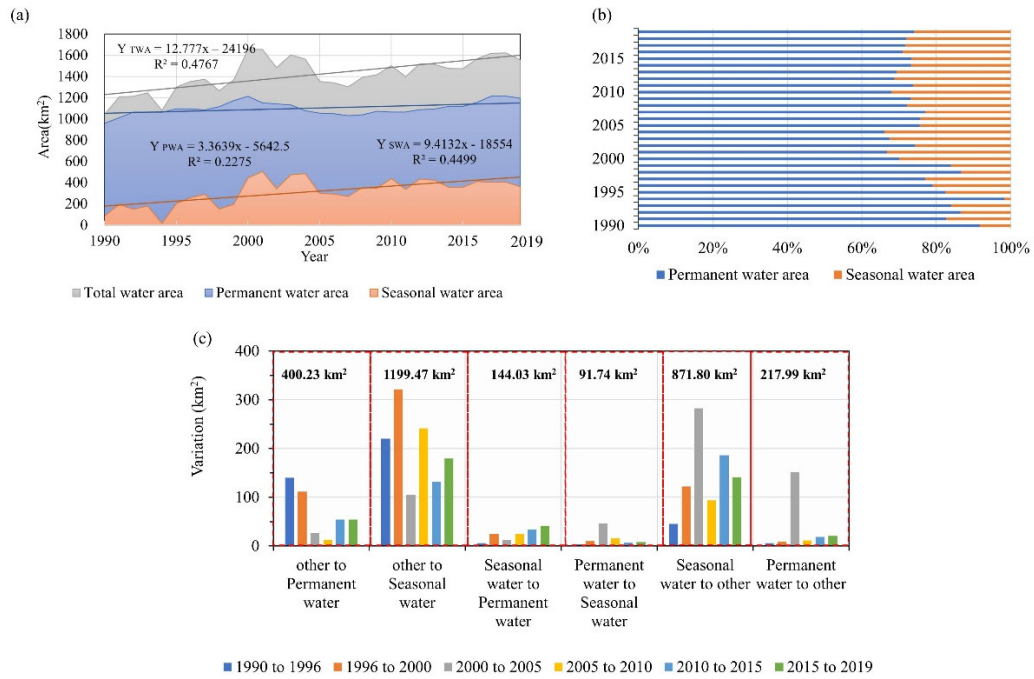

**Figure S6.** 1990-2019 BLB (a) variations of TWA, PWA, SWA, (b) percentage of PWA and SWA, and (c) conversion between different types of water bodies.

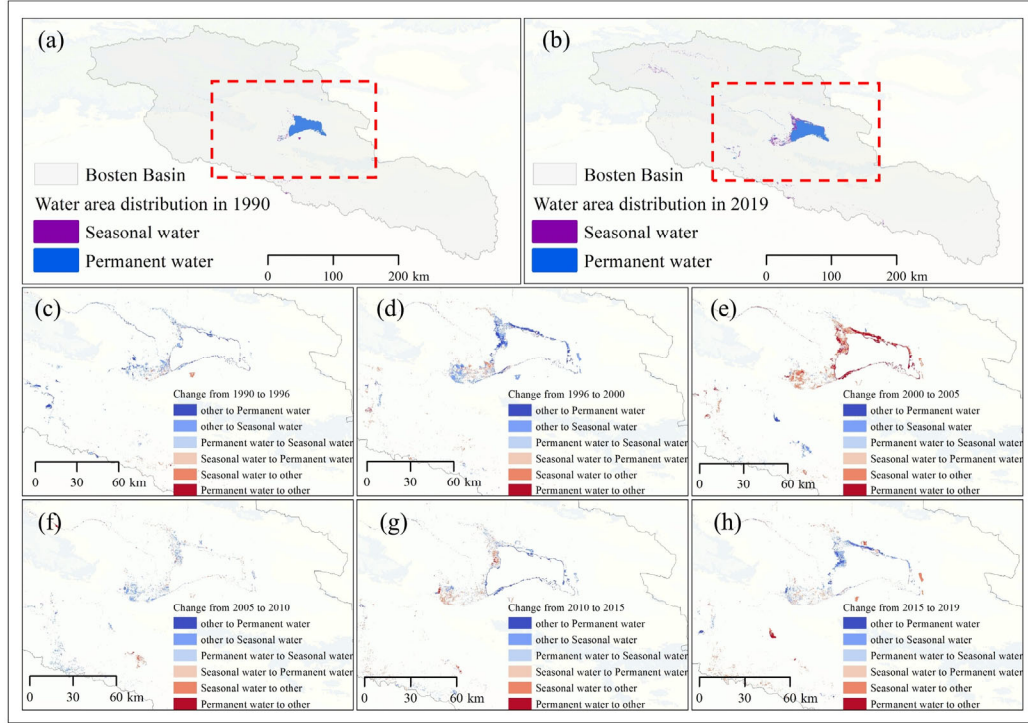

**Figure S7.** (a)Water area distribution in 1990, (b) water area distribution in 2019, (c)water area change from 1990 to 1996, (d) water area change from 1996 to 2000, (e) water area change from 2000 to 2005, (f) water area change from 2005 to 2010, (g) water area change from 2010 to 2015, (h) water area change from 2015 to 2019.

**Table S1.** Details of the data source for this article

| Data                      | Source                                                                                                                                                                                                                               | Data length  |
|---------------------------|--------------------------------------------------------------------------------------------------------------------------------------------------------------------------------------------------------------------------------------|--------------|
| Water area                | JRC Yearly/Monthly Water Classification History, v1.3<br>( <a href="https://earthengine.google.com/">https://earthengine.google.com/</a> )                                                                                           | 1984 to 2019 |
| Bosten Lake level         | Xinjiang Tarim River Basin Authority<br>( <a href="http://www.tahe.gov.cn/cs.htm">http://www.tahe.gov.cn/cs.htm</a> )                                                                                                                | 1990-2019    |
| Precipitation             | TerraClimate ( <a href="http://www.climatologylab.org/">http://www.climatologylab.org/</a> )                                                                                                                                         | 1958 to 2020 |
| Actual Evapotranspiration | TerraClimate ( <a href="http://www.climatologylab.org/">http://www.climatologylab.org/</a> )                                                                                                                                         | 1958 to 2020 |
| Temperature               | 1-km monthly mean temperature dataset for china<br>( <a href="https://data.tpdc.ac.cn/zh-hans/data/71ab4677-b66c-4fd1-a004-b2a541c4d5bf?q=1km">https://data.tpdc.ac.cn/zh-hans/data/71ab4677-b66c-4fd1-a004-b2a541c4d5bf?q=1km</a> ) | 1901-2020    |

|               |                                                                                                                                                                                                                                                                                                                  |              |
|---------------|------------------------------------------------------------------------------------------------------------------------------------------------------------------------------------------------------------------------------------------------------------------------------------------------------------------|--------------|
| Soil Moisture | TerraClimate ( <a href="http://www.climatologylab.org/">http://www.climatologylab.org/</a> )                                                                                                                                                                                                                     | 1958 to 2020 |
| NDVI          | Google Earth Engine<br>( <a href="https://developers.google.com/s/results/earth-engine/datasets?q=MOD13Q1.006%20Terra%20Vegetation%20Indices%2016-Day%20Global%20250m">https://developers.google.com/s/results/earth-engine/datasets?q=MOD13Q1.006%20Terra%20Vegetation%20Indices%2016-Day%20Global%20250m</a> ) | 2000-2020    |
| Population    | WorldPop Global Project Population Data: Estimated Residential Population per 100x100m Grid Square<br>( <a href="https://earthengine.google.com/">https://earthengine.google.com/</a> )                                                                                                                          | 2000 to 2020 |
| Arable area   | MCD12Q1.006 MODIS Land Cover Type Yearly Global 500m( <a href="https://earthengine.google.com/">https://earthengine.google.com/</a> )                                                                                                                                                                            | 2001 to 2020 |

**Table S2.** Classification results of wet, dry and normal years from 1990 to 2019.

| Year | Percentage of runoff anomaly | Type        | Year | Percentage of runoff anomaly | Type        |
|------|------------------------------|-------------|------|------------------------------|-------------|
| 1990 | -23                          | Dry Year    | 2005 | -8                           | Normal Year |
| 1991 | -12                          | Dry Year    | 2006 | 4                            | Normal Year |
| 1992 | -12                          | Dry Year    | 2007 | -2                           | Normal Year |
| 1993 | -18                          | Dry Year    | 2008 | -3                           | Normal Year |
| 1994 | 7                            | Normal Year | 2009 | -1                           | Normal Year |
| 1995 | -25                          | Dry Year    | 2010 | 14                           | Wet Year    |
| 1996 | 5                            | Normal Year | 2011 | 4                            | Normal Year |
| 1997 | 4                            | Normal Year | 2012 | -17                          | Dry Year    |
| 1998 | 6                            | Normal Year | 2013 | -21                          | Dry Year    |
| 1999 | 25                           | Wet Year    | 2014 | -22                          | Dry Year    |
| 2000 | 30                           | Wet Year    | 2015 | -3                           | Normal Year |
| 2001 | 10                           | Wet Year    | 2016 | 1                            | Normal Year |
| 2002 | 47                           | Wet Year    | 2017 | 9                            | Normal Year |
| 2003 | 5                            | Normal      | 2018 | -1                           | Normal      |

|      |    |          |      |      |          |
|------|----|----------|------|------|----------|
|      |    | Year     |      | Year |          |
| 2004 | 10 | Dry Year | 2019 | 26   | Wet Year |

Note: Classification standard: Annual runoff anomaly percentage  $\geq 10$  is a wet year,  $\leq -10$  is a dry year.

**Table S3.** Chinese Environmental Quality for Surface Water III Standard (GB3838-2002)

| Index              | Standard value of water quality classification (mg/L) |              |             |            |            |
|--------------------|-------------------------------------------------------|--------------|-------------|------------|------------|
|                    | I                                                     | II           | III         | IV         | V          |
| DO                 | $\geq 7.5$                                            | $\geq 6$     | $\geq 5$    | $\geq 3$   | $\geq 2$   |
| COD <sub>MN</sub>  | $\leq 2$                                              | $\leq 4$     | $\leq 6$    | $\leq 10$  | $\leq 15$  |
| COD                | $\leq 15$                                             | $\leq 15$    | $\leq 20$   | $\leq 30$  | $\leq 40$  |
| BOD <sub>5</sub>   | $\leq 3$                                              | $\leq 3$     | $\leq 4$    | $\leq 6$   | $\leq 10$  |
| TP (lake)          | $\leq 0.01$                                           | $\leq 0.025$ | $\leq 0.05$ | $\leq 0.1$ | $\leq 0.2$ |
| TN                 | $\leq 0.2$                                            | $\leq 0.5$   | $\leq 1.0$  | $\leq 1.5$ | $\leq 2.0$ |
| NH <sub>3</sub> -N | $\leq 0.15$                                           | $\leq 0.5$   | $\leq 1.0$  | $\leq 1.5$ | $\leq 2$   |

Note: Surface water quality standards of Bosten Lake Basin require a Class III standard.

**Table S4.** Standard for classification of fresh and salt water

| Classification | Fresh water | Brackish water | Salt water | Brine   |
|----------------|-------------|----------------|------------|---------|
| TDS (mg/L)     | 0-1000      | 1000-3000      | 3000-10000 | > 10000 |

**Table S5.** Characteristic values of interannual variation of water quality indexes

| Index              | The proportion of III standards (%) | Slop (mg/L/y) | Max (mg/L) | Min (mg/L) | Mean (mg/L) | Standard Deviation (SD) | Coefficient of Variance (CV) |
|--------------------|-------------------------------------|---------------|------------|------------|-------------|-------------------------|------------------------------|
| DO                 | 100                                 | -0.0096       | 9.1614     | 6.3832     | 7.5242      | 0.6917                  | 0.0919                       |
| COD <sub>MN</sub>  | 100                                 | -0.04         | 5.7049     | 2.7975     | 4.8463      | 0.6623                  | 0.1367                       |
| COD                | 36.84                               | -0.1078       | 28.6824    | 18.1261    | 23.4083     | 3.0854                  | 0.1318                       |
| BOD <sub>5</sub>   | 100                                 | -0.0631       | 2.3104     | 0.7370     | 1.6535      | 0.5123                  | 0.3098                       |
| TP                 | 100                                 | -0.0059       | 0.5081     | 0.0085     | 0.0168      | 0.0085                  | 0.5082                       |
| TN                 | 94.74                               | -0.0008       | 1.0020     | 0.6258     | 0.8301      | 0.0960                  | 0.1157                       |
| NH <sub>3</sub> -N | 100                                 | 0.0081        | 0.5567     | 0.0207     | 0.1232      | 0.0686                  | 0.5567                       |
| TDS                | 10.52                               | -4.8167       | 1799.1266  | 890        | 1308.6739   | 224.1184                | 0.1713                       |

**Table S6.** Multiple stepwise regression results

| Factor        | Coefficient ( $\times 10^{-3}$ ) | P    |
|---------------|----------------------------------|------|
| Precipitation | 6.74                             | 0.05 |

|                           |              |      |
|---------------------------|--------------|------|
| Temperature               | -1.17        | 1    |
| Actual evapotranspiration | <b>-8.79</b> | 0.05 |
| Arable land               | <b>-5.07</b> | 0    |
| Population                | <b>4.01</b>  | 0    |

Note: bolded indicates passing significance test.

**Table S7.** Water System connectivity Project of BLB

| <b>Year</b> | <b>Details</b>                                                                                                                                                                        | <b>Water volume</b>             |
|-------------|---------------------------------------------------------------------------------------------------------------------------------------------------------------------------------------|---------------------------------|
| 1990        | The third diversion hub of the Konqi River was completed.                                                                                                                             | /                               |
| 1992        | Integrated management of reservoirs - water towers - main canals.                                                                                                                     | /                               |
| 1995-2005   | River dredging, diversion hub and artificial canal system construction.                                                                                                               | /                               |
| 2014-2016   | Huangshui River Diversion Project                                                                                                                                                     | /                               |
| 2016-2020   | In order to solve the problems such as the downstream disconnection of the Konqi River, there are four times ecological water deliveries to the Konqi River.                          | $4.89 \times 10^8 \text{m}^3$   |
| 2018        | Ecological water transfer from Huangshui River into Bosten Lake.                                                                                                                      | $1.14 \times 10^8 \text{m}^3$   |
| 2019        | Implementation of water transfer project from the Kaidu River to the Huangshui River, which linked the Kaidu River, the Huangshui River and Bosten Lake.                              | $2.0043 \times 10^8 \text{m}^3$ |
| 2020        | The project of transferring water from Kaidu River to Huangshui River was implemented to strengthen the water system connection between Kaidu River, Huangshui River and Bosten Lake. | $1.648 \times 10^8 \text{m}^3$  |

## References

- Ariken, M., Zhang, F., Liu, K., Fang, C., Kung, H.-T., 2020. Coupling coordination analysis of urbanization and eco-environment in Yanqi Basin based on multi-source remote sensing data. *Ecological Indicators* 114, 106331. <https://doi.org/10.1016/j.ecolind.2020.106331>
- Deng, H., Chen, Y., Wang, H., Zhang, S., 2015. Climate change with elevation and its potential impact on water resources in the Tianshan Mountains, Central Asia. *Global and Planetary*

Change 135, 28–37. <https://doi.org/10.1016/j.gloplacha.2015.09.015>

Fan, M., Xu, J., Chen, Y., Li, W., 2021. Modeling streamflow driven by climate change in data-scarce mountainous basins. *Science of The Total Environment* 790, 148256. <https://doi.org/10.1016/j.scitotenv.2021.148256>

Li, N., McLaughlin, D., Kinzelbach, W., Li, W., Dong, X., 2015. Using an ensemble smoother to evaluate parameter uncertainty of an integrated hydrological model of Yanqi basin. *Journal of Hydrology* 529, 146–158. <https://doi.org/10.1016/j.jhydrol.2015.07.024>
